# Supplementary material for: A Multi-tissue Transcriptome Analysis of Human Metabolites Guides Interpretability of Associations Based on Multi-SNP Models for Gene Expression
Source: PubMed Central journal article supplement (PMC7010967; doi:10.1016/j.ajhg.2020.01.003), 2020-01-23
Supplement: mmc1.pdf [file mmc1.pdf]

The American Journal of Human Genetics, Volume 106

## Supplemental Data

### **A Multi-tissue Transcriptome Analysis of Human Metabolites Guides Interpretability of Associations Based on Multi-SNP Models for Gene Expression**

Anne Ndungu, Anthony Payne, Jason M. Torres, Martijn van de Bunt, and Mark I. McCarthy

## SUPPLEMENTAL FIGURES

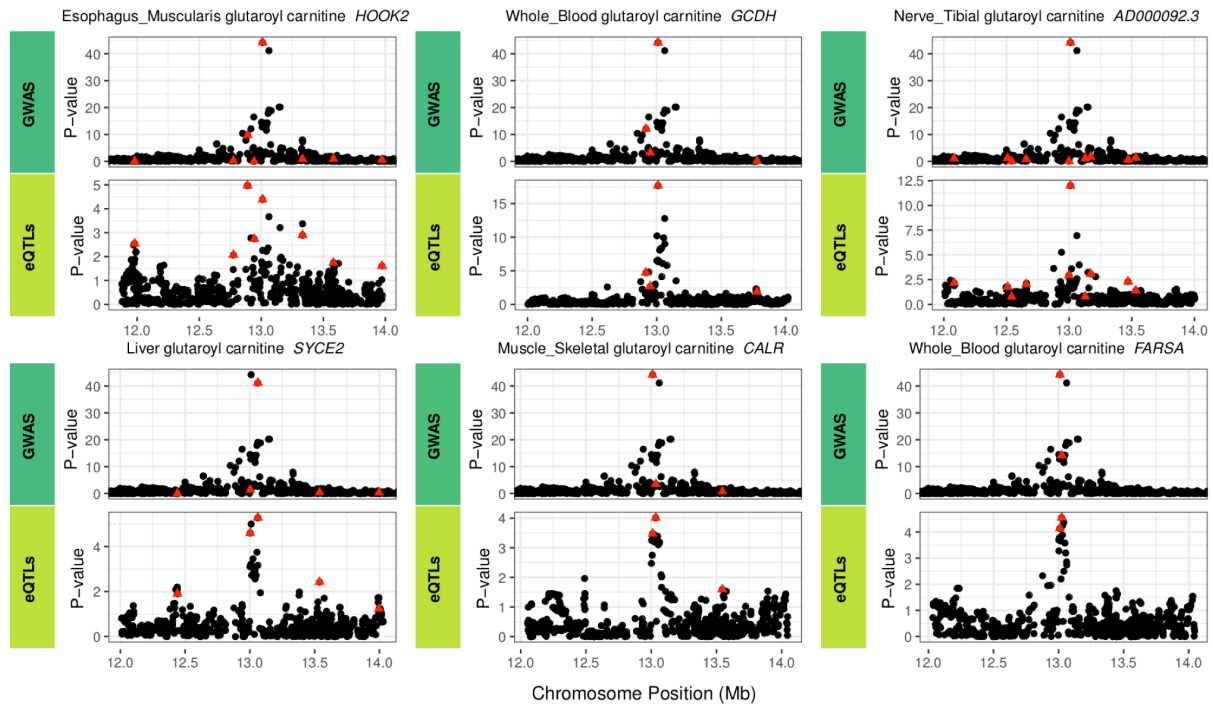

**Figure S1. Gene expression co-regulation at the *GCDH* locus.** Six genes at the *GCDH* locus whose predicted expression significantly mediated glutaroylcarnitine levels. The multi-SNP models for all six genes included the *cis*-eQTL rs8012 that regulates the expression for all the genes. *GCDH* is the true causal gene influencing metabolite levels at this locus.

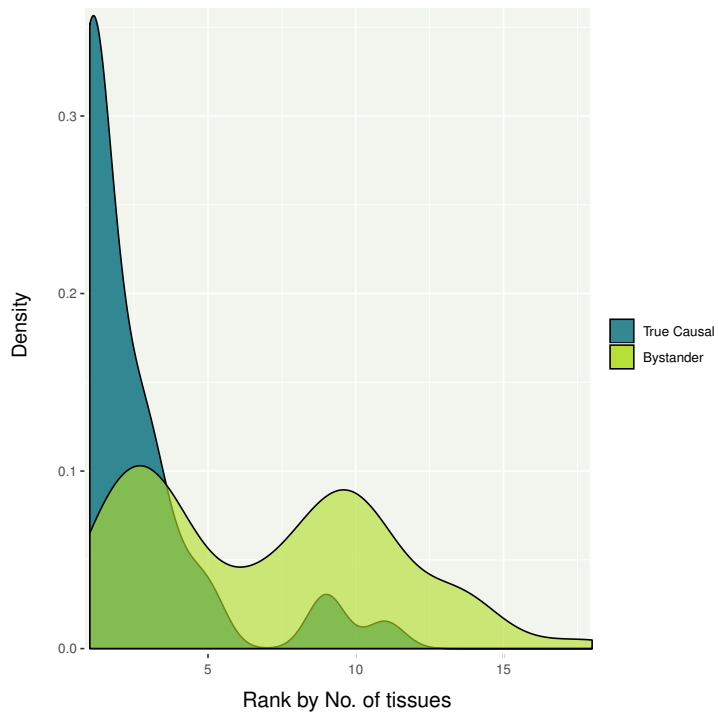

**Figure S2. Causal and bystander gene ranks by number of tissues.** Comparison of ranks by tissue counts for true causal genes and bystander genes at each locus. True causal genes ranked higher (significant in a more tissues) than bystander genes at the same locus.
